# Supplementary material for: VEGFR2-specific FnCAR effectively redirects the cytotoxic activity of T cells and YT NK cells
Source: PubMed Central journal article supplement (PMC5823625; doi:10.18632/oncotarget.24078), 2018-01-09
Supplement: oncotarget-09-9021-s001.pdf [file oncotarget-09-9021-s001.pdf]

# VEGFR2-specific FnCAR effectively redirects the cytotoxic activity of T cells and YT NK cells

## SUPPLEMENTARY MATERIALS

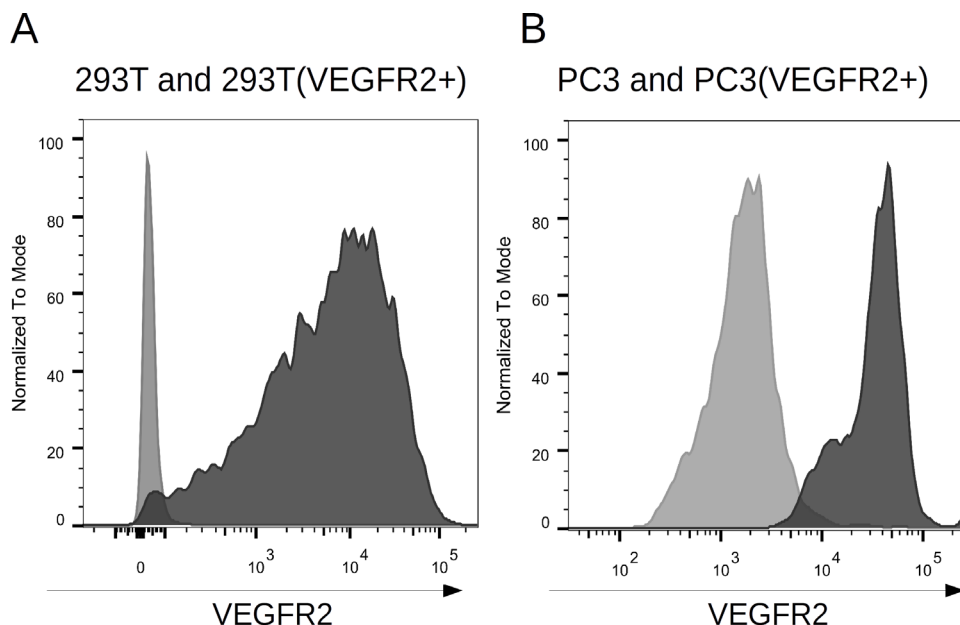

**Supplementary Figure 1:** HEK293T (A) and PC3 (B) cells were stably transduced to express VEGFR2 lacking the intracellular domain and stained with anti-VEGFR2 mAb from Miltenyi (130-093-603). The robust surface expression of VEGFR2 is detectable in transduced but not in parental non-transduced cells.
